# Supplementary material
Source: PubMed Central journal article supplement (PMC6290685)
Supplement: NIHMS944656-supplement-Supp_AppendixS1.pdf [file NIHMS944656-supplement-Supp_AppendixS1.pdf]

## Ecosphere

Simulated climate change increases larval mortality, alters phenology, and affects flight morphology of a dragonfly

Shannon J. McCauley, John I. Hammond, and Karen E. Mabry

### Appendix S1

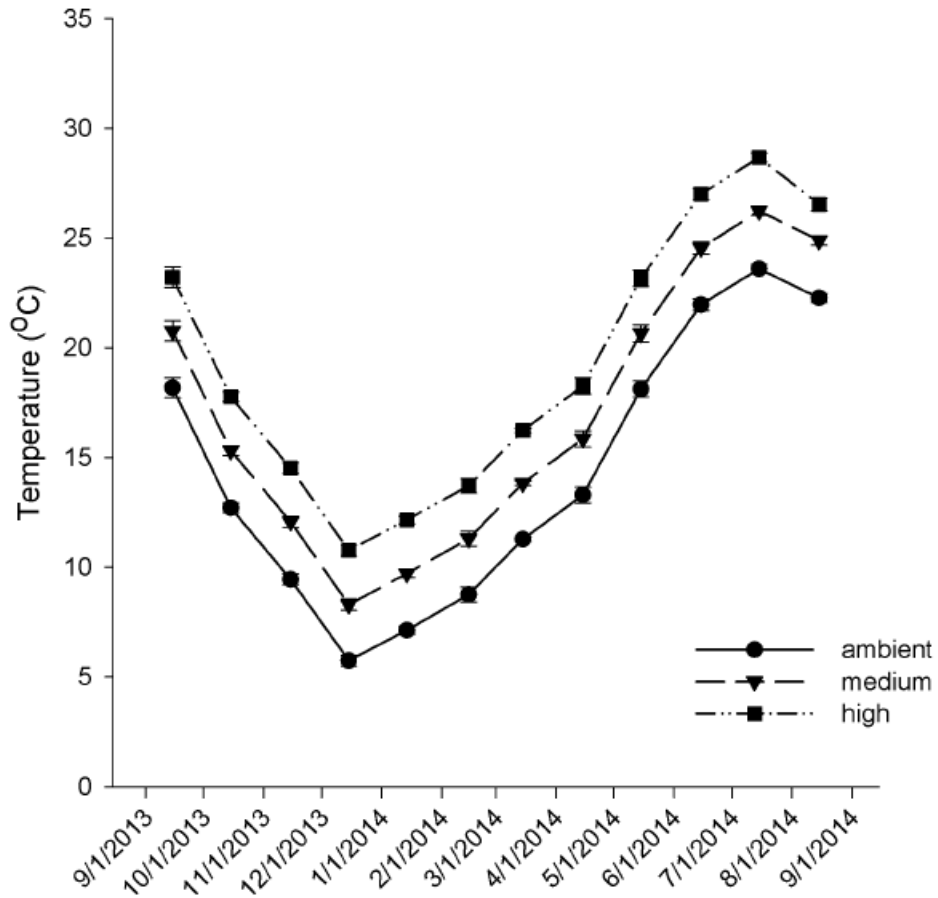

Temperature of mesocosms at monthly intervals (mean degrees C  $\pm$  1 S.E.) across the experiment.
