# Supplementary material
Source: PubMed Central journal article supplement (PMC6290685)
Supplement: NIHMS944656-supplement-Supp_AppendixS2.pdf [file NIHMS944656-supplement-Supp_AppendixS2.pdf]

## Ecosphere

Simulated climate change increases larval mortality, alters phenology, and affects flight morphology of a dragonfly

Shannon J. McCauley, John I. Hammond, and Karen E. Mabry

### Appendix S2

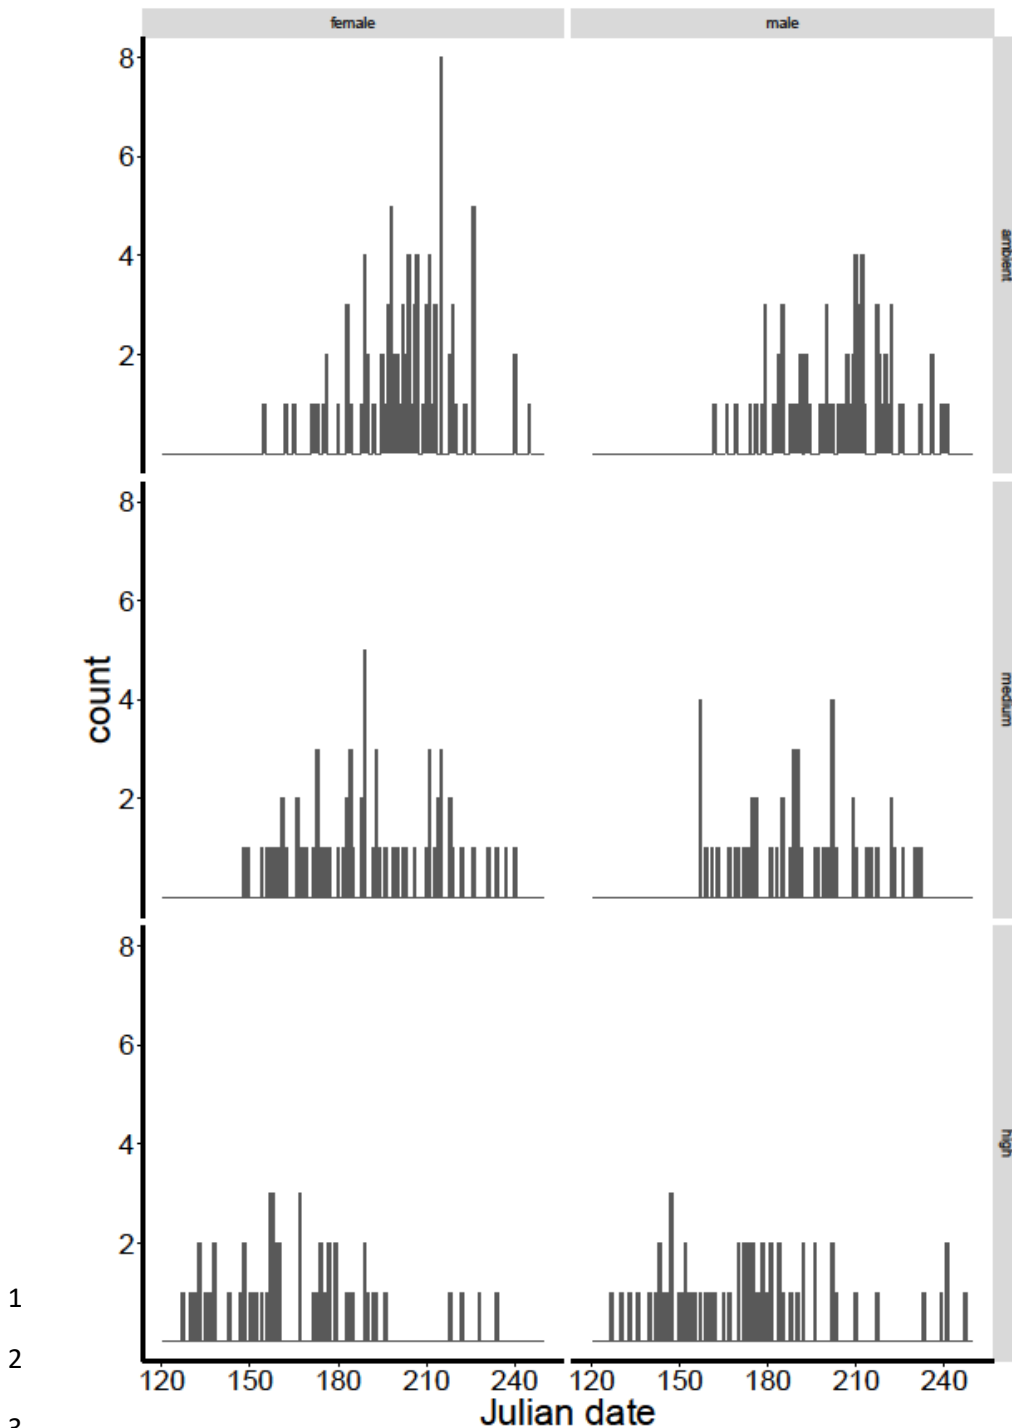

1  
2  
3  
4  
5

Histogram of individual *E. collocata* emerging from the three treatments (ambient, medium, and high), females are on the left and males on the right.
